# Supplementary material for: Gut Seasons: Photoperiod Effects on Fecal Microbiota in Healthy and Cafeteria-Induced Obese Fisher 344 Rats
Source: MDPI journal article supplement (doi:10.3390/nu14030722), 2022-02-08
Supplement: s1 [file s1]

# Gut seasons: Photoperiod effects on faecal microbiota in healthy and cafeteria-induced obese Fisher 344 Rats.

Verónica Arreaza-Gil, Iván Escobar-Martínez, Manuel Suárez, Francisca Isabel Bravo, Begoña Muguerza, Anna Arola-Arnal\*, Cristina Torres-Fuentes

Nutrigenomics Research Group, Departament de Bioquímica i Biotecnologia, Universitat Rovira i Virgili, 43007 Tarragona, Spain; veronica.arreaza@urv.cat (V. A-G); ivan.escobar@urv.cat (I. E-M); manuel.suarez@urv.cat (M.S); franciscasabel@urv.cat (F.I.B); begona.muguerza@urv.cat (B.M.); cristina.torres@urv.cat (C. T-F).

\* Correspondence: anna.arola@urv.cat

## Supplementary Material

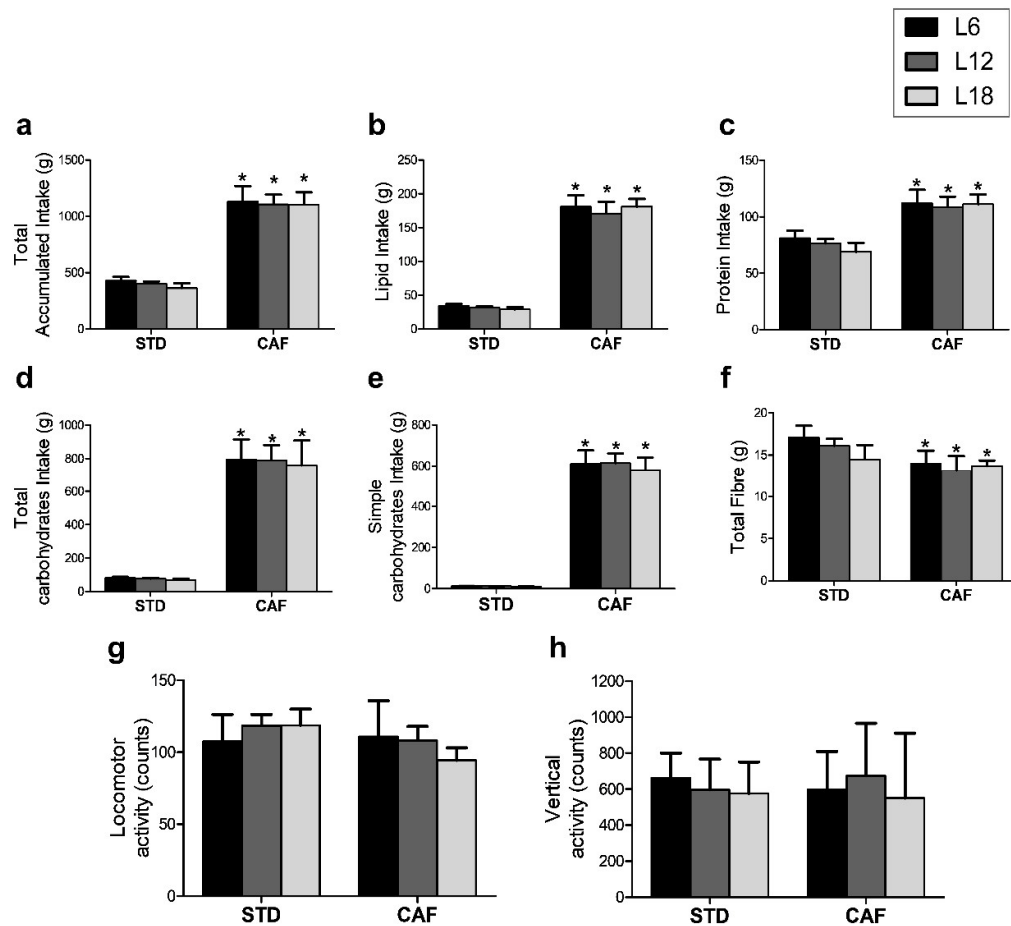

**Figure S1.** Food intake and Physical activity. (a to f): Accumulate food intake (a) and total intake derived from each macronutrient within each dietary groups, showing lipid (b), protein (c), complex carbohydrates (d), simple carbohydrates (e) and fibre (f) consumed by animals during the whole experiment. (g to h): Locomotor and vertical activity. Diet and Photoperiod effects were analysed by 2-way ANOVA followed by LSD post hoc test ( $p < 0.05$ ). \* indicates diet effect comparing STD and CAF-fed rats into each photoperiod conditions. Not significant photoperiod effects were found. Data are plotted as the mean  $\pm$  SD ( $n = 7-8$ ). L6: 6h light/18h darkness; L12: 12h light/12h darkness; L18: 18h light/6h darkness; STD: standard diet; CAF: cafeteria diet.

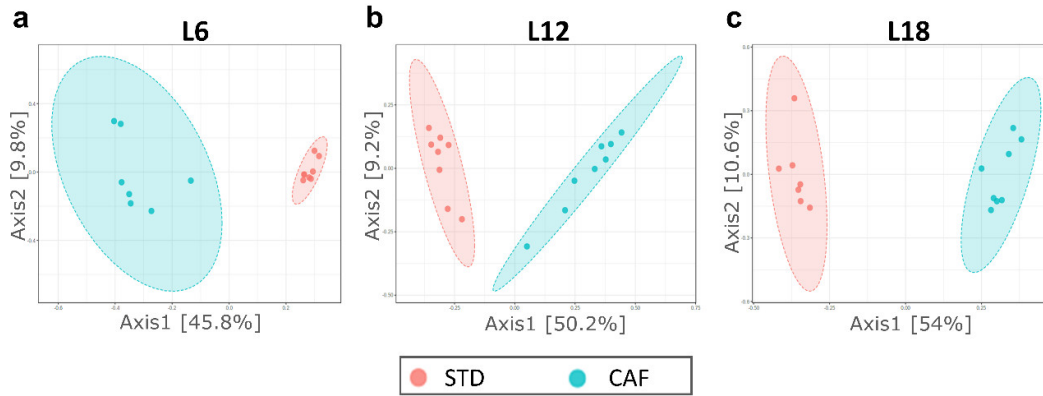

**Figure S2.** Effect of diet on the  $\beta$ -diversity in STD and CAF groups.  $\beta$ -diversity based on Bray-Curtis distances and visualized by a principle coordinates analysis (PCoA) 2D plot of Diet effect. (PERMANOVA test,  $p < 0.001$ ). (n=7-8). L6: 6h light/18h darkness; L12: 12h light/12h darkness; L18: 18h light/6h darkness; STD: standard diet; CAF: cafeteria diet.

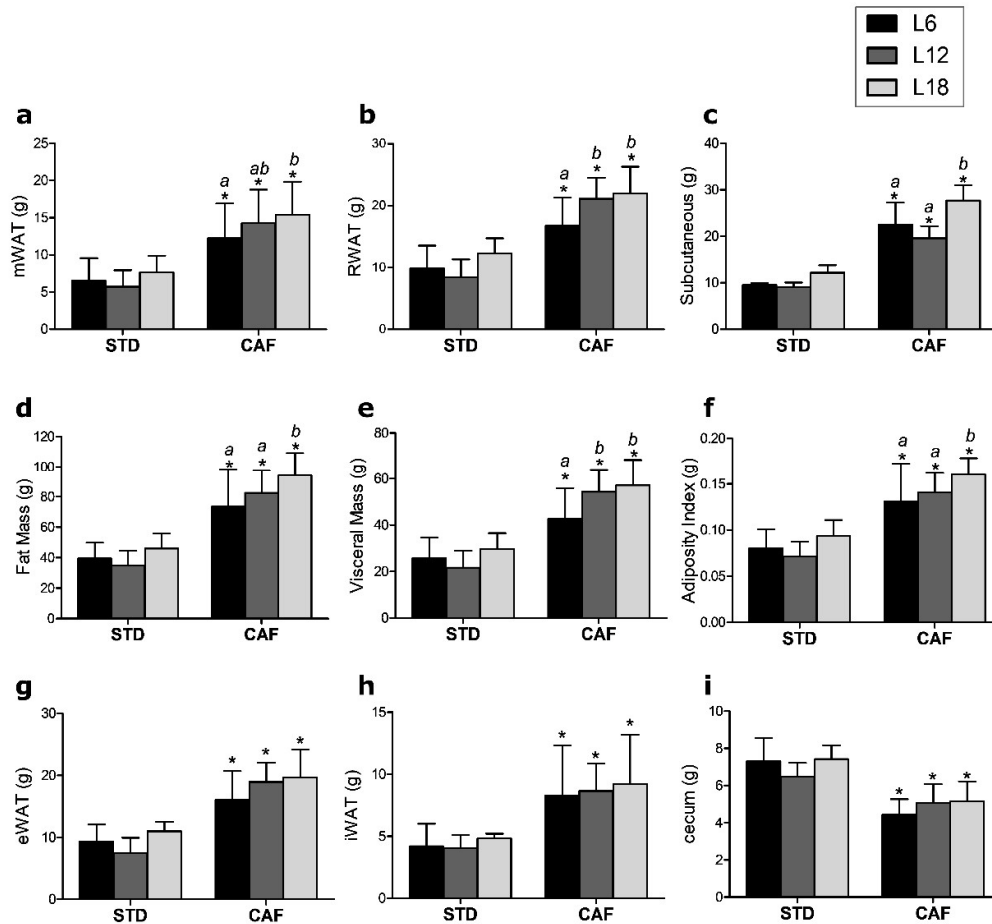

**Figure S3.** Effects of photoperiod on white adipose tissue depots and cecum weight. (a to f): White adipose tissue depots affected by photoperiods: mesenteric white adipose tissue (mWAT), retroperitoneal (RWAT), Subcutaneous, fat mass, visceral mass and adiposity index. (g to i): White adipose tissue depots and Cecum affected only by diet: epididymal white adipose tissue (eWAT), inguinal white adipose tissue (iWAT) and cecum; Diet and Photoperiod effects were analysed by 2-way ANOVA followed by LSD post hoc test ( $p < 0.05$ ). \* and *ab* indicate diet and photoperiod effect respectively. Data are plotted as the mean  $\pm$  SD (n=7-8). L6: 6h light/18h darkness; L12: 12h light/12h darkness; L18: 18h light/6h darkness; STD: standard diet; CAF: cafeteria diet.

**Table S1.** Relative abundance at phylum level of STD- and CAF-fed rats under the three different photoperiods conditions (L6, L12 and L18)

| Bacteria at Phylum level          | Photoperiod | STD                         | P-value<br>Ph STD <sup>b</sup> | CAF                         | P-value<br>Ph CAF <sup>b</sup> | P-value<br>DIET <sup>c</sup> |
|-----------------------------------|-------------|-----------------------------|--------------------------------|-----------------------------|--------------------------------|------------------------------|
|                                   |             | Median (Q1-Q3) <sup>a</sup> |                                | Median (Q1-Q3) <sup>a</sup> |                                |                              |
| Other                             | L6          | 0.002(0.001-0.003)          | 0.109                          | 0.02(0.0054-0.03)**         | 0.292                          | 0.008                        |
|                                   | L12         | 8.71e-04(4.83e-04-0.002)    |                                | 0.01(0.004-0.01)**          |                                | 0.001                        |
|                                   | L18         | 0.002(0.002-0.006)          |                                | 0.006(0.005-0.008)*         |                                | 0.049                        |
| Actinobacteria                    | L6          | 0.07(0.05-0.13)             | 0.408                          | 0.08(0.04-0.18)             | 0.321                          | 1.000                        |
|                                   | L12         | 0.08(0.04-0.36)             |                                | 0.05(0.05-0.06)             |                                | 0.294                        |
|                                   | L18         | 0.10(0.07-0.49)             |                                | 0.06(0.03-0.06)*            |                                | 0.021                        |
| Bacteroidetes                     | L6          | 43.71(25.91-50.17)          | 0.383                          | 52.24(44.61-70.78)*         | 0.084                          | 0.064                        |
|                                   | L12         | 34.34(26.74-45.67)          |                                | 53.86(46.92-61.94)**        |                                | 0.006                        |
|                                   | L18         | 46.78(31.68-56.16)          |                                | 69.27(54.76-76.93)**        |                                | 0.005                        |
| Cyanobacteria                     | L6          | 0.19(0.11-0.23)             | 0.075                          | 0.51(0.17-0.97)             | 0.538                          | 0.105                        |
|                                   | L12         | 0.10(0.07-0.17)             |                                | 0.30(0.23-0.42)**           |                                | 0.002                        |
|                                   | L18         | 0.18(0.14-0.28)             |                                | 0.41(0.30-0.57)**           |                                | 0.004                        |
| Firmicutes                        | L6          | 53.26(46.50-71.98)          | 0.383                          | 42.02(23.69-49.75)*         | 0.072                          | 0.021                        |
|                                   | L12         | 63.49(52.40-71.10)          |                                | 40.02(32.87-48.83)**        |                                | 0.003                        |
|                                   | L18         | 50.65(39.90-61.40)          |                                | 24.51(18.53-37.85)**        |                                | 0.005                        |
| Proteobacteria                    | L6          | 1.10(0.69-1.33)             | 0.553                          | 3.02(2.22-3.71)**           | 0.418                          | 0.001                        |
|                                   | L12         | 0.96(0.53-1.28)             |                                | 3.26(1.89-3.98)**           |                                | 0.002                        |
|                                   | L18         | 1.07(0.86-1.21)             |                                | 4.23(2.06-5.26)**           |                                | 0.004                        |
| Tenericutes                       | L6          | 0.44(0.12-0.69)             | 0.092                          | 7.66e-04(2.64e-04-0.009)**  | 0.846                          | 0.001                        |
|                                   | L12         | 0.53(0.30-0.60)             |                                | 0.001(6.53e-05-0.003)**     |                                | 0.001                        |
|                                   | L18         | 1.21(0.35-1.66)             |                                | 7.92e-04(3.27e-04-0.002)**  |                                | 0.001                        |
| Verrucomicrobia                   | L6          | 0.54(0.39-0.83)             | 0.167                          | 1.92(1.23-2.26)*            | 0.722                          | 0.011                        |
|                                   | L12         | 0.30(0.14-0.47)             |                                | 1.63(0.71-3.76)**           |                                | 0.002                        |
|                                   | L18         | 0.54(0.36-0.65)             |                                | 1.13(0.92-1.83)**           |                                | 0.002                        |
| Ratio Firmicutes to Bacteroidetes | L6          | 1.22(0.93-2.98)             | 0.383                          | 0.80(0.33-1.12)*            | 0.099                          | 0.037                        |
|                                   | L12         | 1.90(1.16-2.66)             |                                | 0.75(0.52-1.04)**           |                                | 0.006                        |
|                                   | L18         | 1.08(0.71-1.94)             |                                | 0.35(0.24-0.70)**           |                                | 0.005                        |

<sup>a</sup>Data shown as median (first and third quartile) in percentage of relative abundance (n=7-8).

<sup>b</sup>P-value by Kruskal-Wallis test comparing photoperiods in STD- or in CAF-fed rats. No photoperiod effect was found at phylum level (P>0.05).

<sup>c</sup>P-value by U-Mann Whitney to evaluate diet effect: \* indicates diet effect when comparing STD and CAF-fed rats by U-Mann Whitney test into each photoperiod. \*P<0.05; \*\*P<0.01.

L6: 6h light/18h darkness; L12: 12h light/12h darkness; L18: 18h light/6h darkness; STD: standard diet; CAF: cafeteria diet.

**Table S2.** Significant Photoperiod and Diet effect at Genus level

| Bacteria at Genus level | Photoperiod | STD                         | P-value<br>Ph STD <sup>b</sup> | CAF                           | P-value<br>Ph CAF <sup>b</sup> | P-value<br>DIET <sup>c</sup> |
|-------------------------|-------------|-----------------------------|--------------------------------|-------------------------------|--------------------------------|------------------------------|
|                         |             | Median (Q1-Q3) <sup>a</sup> |                                | Median (Q1-Q3) <sup>a</sup>   |                                |                              |
| Oscillospira            | L6          | 9.94(7.81-12.9)             | 0.674                          | 3.80(2.86-4.95)**a            | 0.015                          | 0.001                        |
|                         | L12         | 10.7(7.89-11.6)             |                                | 2.65(2.00-3.42)**ab           |                                | 0.001                        |
|                         | L18         | 8.52(6.23-11.9)             |                                | 2.03(1.77-2.63)**b            |                                | 0.001                        |
| <i>Bacteroides</i>      | L6          | 2.06(0.96-2.87)             | 0.856                          | 5.77(3.97-12.4)**a            | 0.004                          | 0.001                        |
|                         | L12         | 1.45(0.87-2.60)             |                                | 4.37(2.77-4.82)**a            |                                | 0.006                        |
|                         | L18         | 2.11(0.79-2.70)             |                                | 10.1(8.22-15.9)**b            |                                | 0.001                        |
| <i>Ruminococcus</i>     | L6          | 1.33(1.20-2.11)             | 0.820                          | 0.47(0.17-0.98)*a             | 0.014                          | 0.015                        |
|                         | L12         | 1.60(1.33-1.97)             |                                | 0.38(0.18-0.56)**a            |                                | 0.001                        |
|                         | L18         | 1.62(1.01-2.04)             |                                | 0.14(0.10-0.17)**b            |                                | 0.001                        |
| <i>Coprococcus</i>      | L6          | 0.82(0.46-1.04)             | 0.807                          | 1.17(0.57-3.53)a              | 0.040                          | 0.247                        |
|                         | L12         | 0.74(0.67-0.85)             |                                | 3.06(1.91-4.57)**ab           |                                | 0.001                        |
|                         | L18         | 0.57(0.51-0.97)             |                                | 4.12(2.23-5.57)**b            |                                | 0.001                        |
| <i>Lactobacillus</i>    | L6          | 1.10(0.41-1.91)             | 0.642                          | 0.69(0.53-1.53)a              | 0.025                          | 0.908                        |
|                         | L12         | 1.39(0.59-2.72)             |                                | 2.38(1.19-3.94)b              |                                | 0.345                        |
|                         | L18         | 1.40(1.01-2.43)             |                                | 0.64(0.17-2.16)a              |                                | 0.298                        |
| <i>Akkermansia</i>      | L6          | 0.54(0.39-0.86)             | 0.167                          | 1.92(1.23-2.26)*              | 0.722                          | 0.011                        |
|                         | L12         | 0.30(0.14-0.47)             |                                | 1.63(0.71-3.76)**             |                                | 0.002                        |
|                         | L18         | 0.54(0.36-0.65)             |                                | 1.13(0.92-1.83)**             |                                | 0.002                        |
| <i>Parabacteroides</i>  | L6          | 0.63(0.26-0.79)             | 0.875                          | 12.45(12.01-17.97)**          | 0.774                          | 0.001                        |
|                         | L12         | 0.43(0.23-0.74)             |                                | 16.87(5.55-19.77)**           |                                | 0.002                        |
|                         | L18         | 0.47(0.32-0.87)             |                                | 16.29(11.20-23.30)**          |                                | 0.001                        |
| SMB53                   | L6          | 0.12(0.01-0.31)             | 0.940                          | 7.99e-04(0-2.36e-03)**        | 0.625                          | 0.004                        |
|                         | L12         | 0.09(0.06-0.17)             |                                | 3.34e-04(5.31e-05-1.01e-03)** |                                | 0.001                        |
|                         | L18         | 0.07(0-0.42)                |                                | 2.45e-04(5.91e-05-7.09e-04)** |                                | 0.001                        |
| <i>Anaeroplasm</i>      | L6          | 0.09(0.03-0.29)             | 0.964                          | 2.64e-04(0-5.11e-04)**        | 0.151                          | 0.005                        |
|                         | L12         | 0.16(0.01-0.41)             |                                | 1.21e-04(0-7.75e-04)**        |                                | 0.003                        |
|                         | L18         | 0.04(0-1.13)                |                                | 5.75e-04(3.17e-04-1.70e-03)*  |                                | 0.024                        |
| <i>Blautia</i>          | L6          | 0.08(0.07-0.13)             | 0.215                          | 8.68(5.19-17.1)**             | 0.610                          | 0.001                        |
|                         | L12         | 0.13(0.09-0.19)             |                                | 8.00(6.86-10.2)**             |                                | 0.001                        |
|                         | L18         | 0.19(0.09-0.20)             |                                | 7.48(3.27-11.6)**             |                                | 0.001                        |
| <i>Lactococcus</i>      | L6          | 0.12(0.05-0.16)             | 0.431                          | 4.64e-03(1.24e-03-7.91e-03)** | 0.483                          | 0.001                        |
|                         | L12         | 0.06(0.04-0.11)             |                                | 6.39e-03(2.39e-03-1.78e-02)** |                                | 0.002                        |
|                         | L18         | 0.09(0.07-0.30)             |                                | 1.27e-02(2.96e-03-2.74e-02)** |                                | 0.001                        |
| <i>Bifidobacterium</i>  | L6          | 0.02(0-0.09)                | 0.543                          | 4.42e-03(5.27e-04-5.25e-02)   | 0.528                          | 0.728                        |
|                         | L12         | 0.04(0.01-0.30)             |                                | 2.87e-03(1.18e-03-6.38e-03)*  |                                | 0.021                        |
|                         | L18         | 0.06(0.01-0.43)             |                                | 1.59e-03(5.97e-04-1.00e-02)** |                                | 0.005                        |

|                        |     |                                       |       |                                       |       |       |
|------------------------|-----|---------------------------------------|-------|---------------------------------------|-------|-------|
| <i>Anaerostipes</i>    | L6  | 0.06(0.04-0.08)                       | 0.343 | 5.90e-04(0-2.51e-02)**                | 0.589 | 0.005 |
|                        | L12 | 0.09(0.05-0.12)                       |       | 6.58e-04(5.68e-05-4.10e-02)*          |       | 0.021 |
|                        | L18 | 0.11(0.06-0.16)                       |       | 3.43e-04(0-7.47e-04)**                |       | 0.001 |
| <i>Dehalobacterium</i> | L6  | 0.05(0.03-0.07)                       | 0.774 | 0.27(5.96e-02-0.46)*                  | 0.162 | 0.021 |
|                        | L12 | 0.07(0.05-0.09)                       |       | 0.13(1.48e-02-0.20)                   |       | 0.401 |
|                        | L18 | 0.06(0.03-0.08)                       |       | 9.50e-02(1.58e-03-0.15)               |       | 0.643 |
| <i>Dorea</i>           | L6  | 0.06(0.05-0.07)                       | 0.589 | 0.12(3.32e-02-0.17)                   | 0.270 | 0.355 |
|                        | L12 | 0.06(0.05-0.10)                       |       | 0.19(0.11-0.39)*                      |       | 0.027 |
|                        | L18 | 0.07(0.06-0.08)                       |       | 0.28(0.10-0.39)*                      |       | 0.021 |
| <i>Sutterella</i>      | L6  | 0.06(0.03-0.08)                       | 0.190 | 1.05(0.89-1.59)**                     | 0.976 | 0.001 |
|                        | L12 | 0.04(0.02-0.13)                       |       | 1.10(0.74-2.39)**                     |       | 0.001 |
|                        | L18 | 0.09(0.05-0.15)                       |       | 1.24(0.50-2.55)**                     |       | 0.001 |
| <i>Roseburia</i>       | L6  | 0.04(0.01-0.06)                       | 0.278 | 0.30(0.02-0.84)*                      | 0.475 | 0.049 |
|                        | L12 | 0.08(0.03-0.10)                       |       | 0.12(0.06-0.24)                       |       | 0.141 |
|                        | L18 | 0.06(0.03-0.11)                       |       | 0.21(0.07-0.27)                       |       | 0.083 |
| <i>Clostridium</i>     | L6  | 0.01(0.01-0.03)                       | 0.564 | 5.60e-03(1.53e-03-1.50e-02)           | 0.059 | 0.083 |
|                        | L12 | 0.01(0.01-0.03)                       |       | 2.14e-03(4.80e-04-8.64e-03)*          |       | 0.012 |
|                        | L18 | 0.01(0.01-0.02)                       |       | 8.93e-04(2.43e-04-1.53e-03)**         |       | 0.001 |
| <i>Lachnospira</i>     | L6  | 0.01(0-0.04) <i>a</i>                 | 0.002 | 1.02e-03(2.64e-04-6.29e-03)*          | 0.344 | 0.015 |
|                        | L12 | 0.01(0.01-0.02) <i>a</i>              |       | 4.43e-03(1.47e-03-8.48e-03)           |       | 0.115 |
|                        | L18 | 1.10e-03(7.80e-04-2.03e-03) <i>b</i>  |       | 3.81e-03(1.36e-03-6.98e-03)*          |       | 0.037 |
| <i>Bilophila</i>       | L6  | 7.85e-03(4.31e-03-1.04e-02)           | 0.653 | 3.20e-03(7.66e-04-8.28e-03)           | 0.201 | 0.064 |
|                        | L12 | 6.50e-03(2.53e-03-1.04e-02)           |       | 1.29e-03(2.21e-04-2.77e-03)*          |       | 0.015 |
|                        | L18 | 4.62e-03(3.05e-03-9.62e-03)           |       | 9.70e-04(2.41e-04-2.04e-03)**         |       | 0.003 |
| <i>Streptococcus</i>   | L6  | 5.49e-03(3.43e-03-1.19e-02) <i>ab</i> | 0.010 | 1.02e-02(5.80e-03-1.66e-02)           | 0.834 | 0.298 |
|                        | L12 | 3.00e-03(1.36e-03-5.00e-03) <i>a</i>  |       | 1.00e-02(7.10e-03-1.29e-02)**         |       | 0.003 |
|                        | L18 | 1.30e-02(7.51e-03-1.74e-02) <i>b</i>  |       | 1.03e-02(5.91e-03-1.46e-02)           |       | 0.298 |
| <i>Moryella</i>        | L6  | 3.59e-03(1.99e-03-6.70e-03) <i>a</i>  | 0.033 | 8.28e-04(6.00e-04-1.32e-03)**         | 0.092 | 0.008 |
|                        | L12 | 9.51e-03(7.90e-03-1.27e-02) <i>ab</i> |       | 1.01e-03(9.23e-04-1.11e-03)**         |       | 0.001 |
|                        | L18 | 8.04e-03(4.19e-03-1.20e-02) <i>b</i>  |       | 1.89e-03(1.19e-03-2.08e-03)**         |       | 0.001 |
| <i>Aggregatibacter</i> | L6  | 3.91e-03(8.89e-04-4.87e-03) <i>ab</i> | 0.034 | 6.21e-03(3.40e-03-1.33e-02)           | 0.739 | 0.132 |
|                        | L12 | 1.81e-03(5.51e-05-2.97e-03) <i>a</i>  |       | 5.00e-03(1.89e-03-1.09e-02)           |       | 0.074 |
|                        | L18 | 7.39e-03(3.90e-03-2.16e-02) <i>b</i>  |       | 1.25e-02(2.96e-03-2.02e-02)           |       | 0.643 |
| <i>Anaerotruncus</i>   | L6  | 2.40e-03(1.40e-03-2.99e-03) <i>a</i>  | 0.006 | 1.28e-02(5.00e-03-8.49e-02)**         | 0.431 | 0.005 |
|                        | L12 | 2.62e-03(1.69e-03-4.13e-03) <i>a</i>  |       | 3.68e-02(1.82e-02-6.35e-02)**         |       | 0.003 |
|                        | L18 | 1.41e-02(1.12e-02-3.99e-02) <i>b</i>  |       | 1.98e-02(1.32e-02-4.27e-02)           |       | 0.643 |
| <i>Allobaculum</i>     | L6  | 8.24e-04(2.79e-04-4.74e-03)           | 0.492 | 8.86e-02(7.66e-04-0.18) <i>a</i>      | 0.044 | 0.064 |
|                        | L12 | 6.53e-04(2.00e-04-3.45e-03)           |       | 3.16e-03(5.99e-04-6.75e-02) <i>ab</i> |       | 0.093 |
|                        | L18 | 5.78e-04(0-1.61e-03)                  |       | 4.53e-04(2.39e-04-1.70e-03) <i>b</i>  |       | 0.816 |

|                       |     |                                       |       |                                       |       |       |
|-----------------------|-----|---------------------------------------|-------|---------------------------------------|-------|-------|
| <i>Epulopiscium</i>   | L6  | 1.89e-03(6.90e-04-3.64e-03) <i>ab</i> | 0.021 | 6.63e-04(4.49e-04-8.28e-04) <i>a</i>  | 0.027 | 0.132 |
|                       | L12 | 2.29e-03(1.04e-03-4.44e-03) <i>a</i>  |       | 2.60e-03(1.22e-03-4.22e-03) <i>b</i>  |       | 0.916 |
|                       | L18 | 2.20e-04(0-7.62e-04) <i>b</i>         |       | 7.85e-04(5.32e-05-1.66e-03) <i>ab</i> |       | 0.346 |
| <i>Rothia</i>         | L6  | 1.18e-03(9.56e-04-2.46e-03)           | 0.156 | 1.24e-03(4.49e-04-1.47e-03)           | 0.050 | 0.954 |
|                       | L12 | 8.92e-04(2.81e-04-2.18e-03)           |       | 8.67e-04(5.15e-04-1.24e-03)           |       | 0.916 |
|                       | L18 | 2.87e-03(1.16e-03-4.26e-03)           |       | 3.72e-04(6.33e-05-6.66e-04)**         |       | 0.001 |
| <i>Enterobacter</i>   | L6  | 2.11e-04(4.48e-05-1.24e-03) <i>a</i>  | 0.037 | 9.99e-04(2.64e-04-1.53e-03)* <i>a</i> | 0.009 | 0.034 |
|                       | L12 | 2.10e-04(0-4.30e-04) <i>a</i>         |       | 7.51e-04(2.47e-04-4.37e-03)* <i>a</i> |       | 0.035 |
|                       | L18 | 3.21e-03(2.89e-04-7.06e-03) <i>b</i>  |       | 5.85e-03(3.36e-03-9.10e-03) <i>b</i>  |       | 0.105 |
| <i>Shuttleworthia</i> | L6  | 5.37e-04(2.06e-04-9.26e-04) <i>a</i>  | 0.008 | 1.53e-03(4.49e-04-7.66e-03)           | 0.875 | 0.165 |
|                       | L12 | 6.36e-04(2.26e-04-1.74e-03) <i>a</i>  |       | 1.22e-03(5.83e-04-2.21e-03)           |       | 0.270 |
|                       | L18 | 0(0-0) <i>b</i>                       |       | 1.30e-03(2.41e-04-5.48e-03)**         |       | 0.004 |
| <i>Xenorhabdus</i>    | L6  | 7.18e-04(4.17e-04-9.33e-04) <i>a</i>  | 0.018 | 1.39e-02(4.74e-03-2.04e-02)*          | 0.884 | 0.011 |
|                       | L12 | 6.30e-04(4.47e-04-1.85e-03) <i>a</i>  |       | 1.32e-02(1.34e-03-0.15)*              |       | 0.012 |
|                       | L18 | 1.75e-03(1.16e-03-5.15e-03) <i>b</i>  |       | 1.32e-02(3.54e-03-4.84e-02)           |       | 0.064 |
| <i>Comamonas</i>      | L6  | 4.72e-04(2.73e-04-1.25e-03) <i>a</i>  | 0.009 | 4.00e-04(0-5.11e-04)                  | 0.112 | 0.267 |
|                       | L12 | 0(0-0) <i>b</i>                       |       | 0(0-0)                                |       | 0.927 |
|                       | L18 | 4.48e-04(2.54e-04-1.75e-03) <i>a</i>  |       | 2.16e-04(0-7.24e-04)                  |       | 0.239 |
| <i>Escherichia</i>    | L6  | 2.99e-04(2.05e-04-6.84e-04)           | 0.382 | 8.25e-03(0-1.38e-02)                  | 0.328 | 0.245 |
|                       | L12 | 3.84e-04(5.09e-05-4.58e-04)           |       | 4.61e-03(5.74e-04-6.38e-02)*          |       | 0.012 |
|                       | L18 | 8.75e-04(2.54e-04-2.69e-03)           |       | 1.24e-02(1.56e-03-3.15e-02)*          |       | 0.028 |
| <i>Anaerofustis</i>   | L6  | 8.96e-05(0-8.23e-04)                  | 0.955 | 1.02e-03(8.28e-04-1.66e-03)*          | 0.219 | 0.045 |
|                       | L12 | 3.01e-04(3.87e-05-4.32e-04)           |       | 1.66e-03(9.29e-04-2.66e-03)**         |       | 0.003 |
|                       | L18 | 2.89e-04(0-7.62e-04)                  |       | 8.84e-04(3.45e-04-1.47e-03)           |       | 0.063 |
| <i>Butyrivibrio</i>   | L6  | 8.96e-05(0-2.20e-04)                  | 0.205 | 5.27e-04(3.32e-04-8.84e-04)**         | 0.761 | 0.007 |
|                       | L12 | 2.04e-04(0-3.55e-04)                  |       | 5.94e-04(2.95e-04-1.80e-03)*          |       | 0.030 |
|                       | L18 | 0(0-0)                                |       | 1.03e-03(3.20e-04-1.50e-03)**         |       | 0.005 |
| <i>Klebsiella</i>     | L6  | 0(0-1.89e-04) <i>a</i>                | 0.013 | 4.49e-04(2.64e-04-1.79e-03)**         | 0.751 | 0.005 |
|                       | L12 | 1.77e-04(0-2.16e-04) <i>b</i>         |       | 1.26e-03(0-1.14e-02)                  |       | 0.178 |
|                       | L18 | 5.20e-04(2.20e-04-8.75e-04) <i>ab</i> |       | 1.23e-03(4.87e-04-3.82e-03)           |       | 0.247 |
| <i>Morganella</i>     | L6  | 0(0-2.24e-05) <i>a</i>                | 0.024 | 2.64e-04(0-1.33e-03)*                 | 0.340 | 0.046 |
|                       | L12 | 9.94e-05(0-3.82e-04) <i>b</i>         |       | 0(0-6.63e-04)                         |       | 0.469 |
|                       | L18 | 2.60e-04(2.20e-04-4.48e-04) <i>ab</i> |       | 2.50e-04(5.41e-05-1.19e-03)           |       | 1.000 |

<sup>a</sup>Data shown as median (first and third quartile) in percentage of relative abundance (n=7-8).

<sup>b</sup>P-value by Kruskal-Wallis test comparing photoperiods in STD- or in CAF-fed rats. *ab* letters indicate Photoperiod effect analyzed by Kruskal-Wallis test followed by Bonferroni *p*-values adjustment: *p*<0.016.

<sup>c</sup>P-value by U-Mann Whitney to evaluate diet effect. \* indicates diet effect when comparing STD- and CAF-fed rats into each photoperiod by U-Mann Whitney test: \**P*<0.05. \*\**P*<0.01.

L6: 6h light/18h darkness; L12: 12h light/12h darkness; L18: 18h light/6h darkness; STD: standard diet; CAF: cafeteria diet.

**Table S3.** Significant Spearman's correlations between Body weight gain and fat parameters with the relative abundance bacteria at different taxonomic levels

| Body weight gain and Fat parameters | Bacteria        | rho <sup>a</sup> | P-value <sup>b</sup> | FDR <sup>b</sup> |
|-------------------------------------|-----------------|------------------|----------------------|------------------|
| <i>PHYLUM</i>                       |                 |                  |                      |                  |
| Fat mass                            | Proteobacteria  | 0.743            | 3.25E-09             | 0.001            |
| RWAT                                | Proteobacteria  | 0.740            | 4.16E-09             | 0.002            |
| Visceral fat                        | Proteobacteria  | 0.734            | 6.55E-09             | 0.002            |
| Adiposity Index                     | Proteobacteria  | 0.731            | 8.14E-09             | 0.003            |
| Gain weight (g)                     | Proteobacteria  | 0.723            | 1.38E-08             | 0.004            |
| iWAT                                | Proteobacteria  | 0.719            | 1.76E-08             | 0.005            |
| eWAT                                | Proteobacteria  | 0.700            | 6.06E-08             | 0.006            |
| Fat mass                            | Tenericutes     | -0.697           | 7.45E-08             | 0.006            |
| mWAT                                | Proteobacteria  | 0.689            | 1.21E-07             | 0.007            |
| iWAT                                | Tenericutes     | -0.677           | 2.34E-07             | 0.008            |
| Adiposity Index                     | Tenericutes     | -0.676           | 2.60E-07             | 0.009            |
| Visceral fat                        | Tenericutes     | -0.672           | 3.16E-07             | 0.010            |
| RWAT                                | Tenericutes     | -0.663           | 5.13E-07             | 0.010            |
| eWAT                                | Tenericutes     | -0.663           | 5.19E-07             | 0.011            |
| iWAT                                | Cyanobacteria   | 0.648            | 1.10E-06             | 0.012            |
| Gain weight (g)                     | Tenericutes     | -0.643           | 1.45E-06             | 0.013            |
| eWAT                                | Verrucomicrobia | 0.629            | 2.85E-06             | 0.013            |
| Subcutaneous                        | Proteobacteria  | 0.621            | 4.11E-06             | 0.014            |
| mWAT                                | Tenericutes     | -0.609           | 7.21E-06             | 0.015            |
| iWAT                                | Verrucomicrobia | 0.607            | 7.60E-06             | 0.016            |
| Fat mass                            | Cyanobacteria   | 0.591            | 1.52E-05             | 0.017            |
| Visceral fat                        | Verrucomicrobia | 0.586            | 1.90E-05             | 0.017            |
| Fat mass                            | Verrucomicrobia | 0.585            | 1.94E-05             | 0.018            |
| eWAT                                | Cyanobacteria   | 0.579            | 2.46E-05             | 0.019            |
| eWAT                                | Firmicutes      | -0.572           | 3.22E-05             | 0.020            |
| mWAT                                | Cyanobacteria   | 0.570            | 3.52E-05             | 0.021            |
| Adiposity Index                     | Verrucomicrobia | 0.567            | 4.03E-05             | 0.021            |
| Adiposity Index                     | Cyanobacteria   | 0.564            | 4.45E-05             | 0.022            |
| RWAT                                | Cyanobacteria   | 0.564            | 4.48E-05             | 0.023            |
| RWAT                                | Verrucomicrobia | 0.562            | 4.82E-05             | 0.024            |
| mWAT                                | Verrucomicrobia | 0.559            | 5.49E-05             | 0.025            |
| Visceral fat                        | Cyanobacteria   | 0.558            | 5.51E-05             | 0.025            |
| Gain weight (g)                     | Firmicutes      | -0.550           | 7.53E-05             | 0.026            |
| Gain weight (g)                     | Cyanobacteria   | 0.547            | 8.39E-05             | 0.027            |
| Subcutaneous                        | Tenericutes     | -0.542           | 9.92E-05             | 0.028            |
| eWAT                                | Bacteroidetes   | 0.528            | 1.64E-04             | 0.029            |
| Subcutaneous                        | Cyanobacteria   | 0.521            | 2.04E-04             | 0.029            |
| Fat mass                            | Firmicutes      | -0.519           | 2.18E-04             | 0.030            |
| Visceral fat                        | Firmicutes      | -0.514           | 2.55E-04             | 0.031            |
| RWAT                                | Firmicutes      | -0.509           | 3.05E-04             | 0.032            |
| Gain weight (g)                     | Bacteroidetes   | 0.504            | 3.55E-04             | 0.033            |
| Adiposity Index                     | Firmicutes      | -0.500           | 4.00E-04             | 0.033            |
| Gain weight (g)                     | Verrucomicrobia | 0.477            | 8.11E-04             | 0.034            |
| Visceral fat                        | Bacteroidetes   | 0.469            | 1.00E-03             | 0.035            |
| Fat mass                            | Bacteroidetes   | 0.465            | 1.12E-03             | 0.036            |
| Subcutaneous                        | Firmicutes      | -0.457           | 1.42E-03             | 0.037            |
| RWAT                                | Bacteroidetes   | 0.450            | 1.72E-03             | 0.037            |
| Adiposity Index                     | Bacteroidetes   | 0.448            | 1.81E-03             | 0.038            |
| Subcutaneous                        | Verrucomicrobia | 0.445            | 1.95E-03             | 0.039            |
| iWAT                                | Firmicutes      | -0.443           | 2.06E-03             | 0.040            |
| mWAT                                | Firmicutes      | -0.438           | 2.31E-03             | 0.040            |
| Subcutaneous                        | Bacteroidetes   | 0.406            | 5.15E-03             | 0.041            |
| mWAT                                | Bacteroidetes   | 0.388            | 7.63E-03             | 0.042            |

|                 |                    |        |          |       |
|-----------------|--------------------|--------|----------|-------|
| iWAT            | Bacteroidetes      | 0.364  | 1.28E-02 | 0.043 |
| Visceral fat    | Actinobacteria     | -0.312 | 3.45E-02 | 0.044 |
| eWAT            | Actinobacteria     | -0.311 | 3.57E-02 | 0.044 |
| Fat mass        | Actinobacteria     | -0.302 | 4.11E-02 | 0.045 |
| Adiposity Index | Actinobacteria     | -0.284 | 5.57E-02 | 0.046 |
| mWAT            | Actinobacteria     | -0.222 | 1.39E-01 | 0.047 |
| RWAT            | Actinobacteria     | -0.221 | 1.40E-01 | 0.048 |
| iWAT            | Actinobacteria     | -0.220 | 1.42E-01 | 0.048 |
| Gain weight (g) | Actinobacteria     | -0.210 | 1.61E-01 | 0.049 |
| Subcutaneous    | Actinobacteria     | -0.167 | 2.67E-01 | 0.050 |
| <b>CLASS</b>    |                    |        |          |       |
| Fat mass        | Betaproteobacteria | 0.774  | 2.93E-10 | 0.000 |
| Adiposity Index | Betaproteobacteria | 0.769  | 4.37E-10 | 0.001 |
| Gain weight (g) | Betaproteobacteria | 0.762  | 7.54E-10 | 0.001 |
| RWAT            | Betaproteobacteria | 0.759  | 9.72E-10 | 0.002 |
| Visceral fat    | Betaproteobacteria | 0.753  | 1.58E-09 | 0.002 |
| eWAT            | Betaproteobacteria | 0.744  | 3.02E-09 | 0.003 |
| iWAT            | Betaproteobacteria | 0.740  | 4.28E-09 | 0.003 |
| eWAT            | Erysipelotrichi    | 0.737  | 5.30E-09 | 0.003 |
| Gain weight (g) | Erysipelotrichi    | 0.734  | 6.50E-09 | 0.004 |
| mWAT            | Betaproteobacteria | 0.725  | 1.21E-08 | 0.004 |
| Visceral fat    | Erysipelotrichi    | 0.716  | 2.16E-08 | 0.005 |
| Fat mass        | Erysipelotrichi    | 0.712  | 2.82E-08 | 0.005 |
| RWAT            | Erysipelotrichi    | 0.704  | 4.67E-08 | 0.006 |
| Subcutaneous    | Betaproteobacteria | 0.699  | 6.54E-08 | 0.006 |
| Adiposity Index | Erysipelotrichi    | 0.697  | 7.32E-08 | 0.006 |
| iWAT            | Erysipelotrichi    | 0.692  | 9.89E-08 | 0.007 |
| Fat mass        | Mollicutes         | -0.688 | 1.28E-07 | 0.007 |
| Visceral fat    | Mollicutes         | -0.673 | 2.95E-07 | 0.008 |
| eWAT            | Mollicutes         | -0.670 | 3.60E-07 | 0.008 |
| mWAT            | Erysipelotrichi    | 0.669  | 3.70E-07 | 0.009 |
| Adiposity Index | Mollicutes         | -0.669 | 3.81E-07 | 0.009 |
| RWAT            | Mollicutes         | -0.666 | 4.45E-07 | 0.009 |
| iWAT            | Mollicutes         | -0.655 | 7.86E-07 | 0.010 |
| iWAT            | 4C0d_2             | 0.650  | 9.92E-07 | 0.010 |
| Gain weight (g) | Mollicutes         | -0.629 | 2.83E-06 | 0.011 |
| eWAT            | Verrucomicrobiae   | 0.629  | 2.85E-06 | 0.011 |
| iWAT            | Verrucomicrobiae   | 0.607  | 7.60E-06 | 0.012 |
| eWAT            | Clostridia         | -0.604 | 8.88E-06 | 0.012 |
| mWAT            | Mollicutes         | -0.604 | 8.89E-06 | 0.012 |
| Gain weight (g) | Clostridia         | -0.594 | 1.33E-05 | 0.013 |
| Fat mass        | 4C0d_2             | 0.591  | 1.51E-05 | 0.013 |
| Subcutaneous    | Erysipelotrichi    | 0.590  | 1.60E-05 | 0.014 |
| Visceral fat    | Verrucomicrobiae   | 0.586  | 1.90E-05 | 0.014 |
| Fat mass        | Verrucomicrobiae   | 0.585  | 1.94E-05 | 0.015 |
| eWAT            | 4C0d_2             | 0.581  | 2.35E-05 | 0.015 |
| mWAT            | 4C0d_2             | 0.570  | 3.57E-05 | 0.015 |
| Adiposity Index | Verrucomicrobiae   | 0.567  | 4.03E-05 | 0.016 |
| RWAT            | 4C0d_2             | 0.565  | 4.36E-05 | 0.016 |
| Adiposity Index | 4C0d_2             | 0.564  | 4.51E-05 | 0.017 |
| RWAT            | Verrucomicrobiae   | 0.562  | 4.82E-05 | 0.017 |
| Visceral fat    | 4C0d_2             | 0.559  | 5.41E-05 | 0.018 |
| mWAT            | Verrucomicrobiae   | 0.559  | 5.49E-05 | 0.018 |
| Fat mass        | Clostridia         | -0.555 | 6.18E-05 | 0.018 |
| Visceral fat    | Clostridia         | -0.553 | 6.61E-05 | 0.019 |



|                          |                     |        |          |          |
|--------------------------|---------------------|--------|----------|----------|
| Gain weight (g)          | 4C0d_2              | 0.548  | 7.99E-05 | 0.019    |
| Subcutaneous             | Mollicutes          | -0.542 | 9.88E-05 | 0.020    |
| RWAT                     | Clostridia          | -0.538 | 1.17E-04 | 0.020    |
| Adiposity Index          | Clostridia          | -0.535 | 1.29E-04 | 0.021    |
| eWAT                     | Bacteroidia         | 0.528  | 1.64E-04 | 0.021    |
| Fat mass                 | Actinobacteria      | -0.524 | 1.86E-04 | 0.021    |
| Subcutaneous             | 4C0d_2              | 0.520  | 2.13E-04 | 0.022    |
| eWAT                     | Actinobacteria      | -0.518 | 2.27E-04 | 0.022    |
| Visceral fat             | Actinobacteria      | -0.509 | 3.03E-04 | 0.023    |
| Gain weight (g)          | Bacteroidia         | 0.504  | 3.55E-04 | 0.023    |
| Adiposity Index          | Actinobacteria      | -0.501 | 3.88E-04 | 0.024    |
| Subcutaneous             | Clostridia          | -0.489 | 5.62E-04 | 0.024    |
| mWAT                     | Clostridia          | -0.482 | 6.90E-04 | 0.024    |
| iWAT                     | Clostridia          | -0.481 | 7.10E-04 | 0.025    |
| Gain weight (g)          | Verrucomicrobiae    | 0.477  | 8.11E-04 | 0.025    |
| Visceral fat             | Bacteroidia         | 0.469  | 1.00E-03 | 0.026    |
| Fat mass                 | Bacteroidia         | 0.465  | 1.12E-03 | 0.026    |
| RWAT                     | Bacteroidia         | 0.450  | 1.72E-03 | 0.026    |
| Adiposity Index          | Bacteroidia         | 0.448  | 1.81E-03 | 0.027    |
| Subcutaneous             | Verrucomicrobiae    | 0.445  | 1.95E-03 | 0.027    |
| iWAT                     | Deltaproteobacteria | 0.438  | 2.33E-03 | 0.028    |
| RWAT                     | Actinobacteria      | -0.428 | 2.98E-03 | 0.028    |
| iWAT                     | Actinobacteria      | -0.425 | 3.21E-03 | 0.029    |
| Gain weight (g)          | Actinobacteria      | -0.419 | 3.79E-03 | 0.029    |
| mWAT                     | Actinobacteria      | -0.407 | 5.05E-03 | 0.029    |
| Subcutaneous             | Bacteroidia         | 0.406  | 5.15E-03 | 0.030    |
| Subcutaneous             | Actinobacteria      | -0.405 | 5.22E-03 | 0.030    |
| mWAT                     | Bacteroidia         | 0.388  | 7.63E-03 | 0.031    |
| iWAT                     | Bacteroidia         | 0.364  | 1.28E-02 | 0.031    |
| Visceral fat             | Gammaproteobacteria | 0.352  | 1.63E-02 | 0.032    |
| eWAT                     | Alphaproteobacteria | 0.350  | 1.70E-02 | 0.032    |
| Subcutaneous             | Alphaproteobacteria | 0.341  | 2.02E-02 | 0.032    |
| RWAT                     | Alphaproteobacteria | 0.334  | 2.33E-02 | 0.033    |
| RWAT                     | Deltaproteobacteria | 0.321  | 2.94E-02 | 0.033    |
| mWAT                     | Gammaproteobacteria | 0.318  | 3.12E-02 | 0.034    |
| <hr/> <i>ORDER</i> <hr/> |                     |        |          |          |
| Fat mass                 | Burkholderiales     | 0.773  | 3.00E-10 | 3.70E-04 |
| Adiposity Index          | Burkholderiales     | 0.768  | 4.51E-10 | 0.001    |
| Gain weight (g)          | Burkholderiales     | 0.764  | 6.68E-10 | 0.001    |
| RWAT                     | Burkholderiales     | 0.760  | 9.25E-10 | 0.001    |
| Visceral fat             | Burkholderiales     | 0.753  | 1.55E-09 | 0.002    |
| eWAT                     | Burkholderiales     | 0.745  | 2.99E-09 | 0.002    |
| iWAT                     | Burkholderiales     | 0.737  | 5.08E-09 | 0.003    |
| eWAT                     | Erysipelotrichales  | 0.737  | 5.30E-09 | 0.003    |
| Gain weight (g)          | Erysipelotrichales  | 0.734  | 6.50E-09 | 0.003    |
| mWAT                     | Burkholderiales     | 0.725  | 1.20E-08 | 0.004    |
| Visceral fat             | Erysipelotrichales  | 0.716  | 2.16E-08 | 0.004    |
| Fat mass                 | Erysipelotrichales  | 0.712  | 2.82E-08 | 0.004    |
| RWAT                     | Erysipelotrichales  | 0.704  | 4.67E-08 | 0.005    |

|                 |                    |        |          |       |
|-----------------|--------------------|--------|----------|-------|
| Subcutaneous    | Burkholderiales    | 0.698  | 7.10E-08 | 0.005 |
| Adiposity Index | Erysipelotrichales | 0.697  | 7.32E-08 | 0.006 |
| iWAT            | Erysipelotrichales | 0.692  | 9.89E-08 | 0.006 |
| RWAT            | Turicibacterales   | -0.685 | 1.48E-07 | 0.006 |
| eWAT            | Pseudomonadales    | 0.679  | 2.19E-07 | 0.007 |
| eWAT            | Turicibacterales   | -0.674 | 2.89E-07 | 0.007 |
| mWAT            | Erysipelotrichales | 0.669  | 3.70E-07 | 0.007 |
| Visceral fat    | Turicibacterales   | -0.668 | 3.90E-07 | 0.008 |
| Fat mass        | Turicibacterales   | -0.668 | 3.96E-07 | 0.008 |
| mWAT            | Turicibacterales   | -0.657 | 7.02E-07 | 0.009 |
| Adiposity Index | Turicibacterales   | -0.652 | 9.38E-07 | 0.009 |
| iWAT            | YS2                | 0.650  | 9.92E-07 | 0.009 |
| Visceral fat    | Pseudomonadales    | 0.644  | 1.39E-06 | 0.010 |
| eWAT            | Verrucomicrobiales | 0.629  | 2.85E-06 | 0.010 |
| Fat mass        | Pseudomonadales    | 0.618  | 4.66E-06 | 0.010 |
| iWAT            | Turicibacterales   | -0.615 | 5.51E-06 | 0.011 |
| iWAT            | Verrucomicrobiales | 0.607  | 7.60E-06 | 0.011 |
| eWAT            | Clostridiales      | -0.604 | 8.88E-06 | 0.011 |
| Gain weight (g) | Turicibacterales   | -0.597 | 1.21E-05 | 0.012 |
| Adiposity Index | Pseudomonadales    | 0.596  | 1.25E-05 | 0.012 |
| Gain weight (g) | Clostridiales      | -0.594 | 1.33E-05 | 0.013 |
| Fat mass        | YS2                | 0.591  | 1.51E-05 | 0.013 |
| Subcutaneous    | Erysipelotrichales | 0.590  | 1.60E-05 | 0.013 |
| Visceral fat    | Verrucomicrobiales | 0.586  | 1.90E-05 | 0.014 |
| Fat mass        | Verrucomicrobiales | 0.585  | 1.94E-05 | 0.014 |
| eWAT            | YS2                | 0.581  | 2.35E-05 | 0.014 |
| RWAT            | Anaeroplasmatales  | -0.579 | 2.50E-05 | 0.015 |
| RWAT            | Pseudomonadales    | 0.575  | 2.96E-05 | 0.015 |
| mWAT            | YS2                | 0.570  | 3.57E-05 | 0.016 |
| Adiposity Index | Verrucomicrobiales | 0.567  | 4.03E-05 | 0.016 |
| RWAT            | YS2                | 0.565  | 4.36E-05 | 0.016 |
| mWAT            | Pseudomonadales    | 0.564  | 4.50E-05 | 0.017 |
| Adiposity Index | YS2                | 0.564  | 4.51E-05 | 0.017 |
| Gain weight (g) | Pseudomonadales    | 0.563  | 4.66E-05 | 0.017 |
| RWAT            | Verrucomicrobiales | 0.562  | 4.82E-05 | 0.018 |
| Visceral fat    | YS2                | 0.559  | 5.41E-05 | 0.018 |
| mWAT            | Verrucomicrobiales | 0.559  | 5.49E-05 | 0.019 |
| Fat mass        | Clostridiales      | -0.555 | 6.18E-05 | 0.019 |
| Visceral fat    | Clostridiales      | -0.553 | 6.61E-05 | 0.019 |
| Gain weight (g) | YS2                | 0.548  | 7.99E-05 | 0.020 |
| RWAT            | Clostridiales      | -0.538 | 1.17E-04 | 0.020 |
| Adiposity Index | Clostridiales      | -0.535 | 1.29E-04 | 0.020 |
| mWAT            | Anaeroplasmatales  | -0.530 | 1.53E-04 | 0.021 |
| iWAT            | Anaeroplasmatales  | -0.529 | 1.57E-04 | 0.021 |
| eWAT            | Bacteroidales      | 0.528  | 1.64E-04 | 0.021 |
| iWAT            | Pseudomonadales    | 0.526  | 1.76E-04 | 0.022 |
| Subcutaneous    | YS2                | 0.520  | 2.13E-04 | 0.022 |
| Fat mass        | Anaeroplasmatales  | -0.519 | 2.22E-04 | 0.023 |
| Visceral fat    | Anaeroplasmatales  | -0.513 | 2.64E-04 | 0.023 |
| Adiposity Index | Anaeroplasmatales  | -0.510 | 2.97E-04 | 0.023 |
| Gain weight (g) | Bacteroidales      | 0.504  | 3.55E-04 | 0.024 |
| Subcutaneous    | Pseudomonadales    | 0.502  | 3.78E-04 | 0.024 |
| eWAT            | Anaeroplasmatales  | -0.499 | 4.17E-04 | 0.024 |
| Subcutaneous    | Clostridiales      | -0.489 | 5.62E-04 | 0.025 |
| Subcutaneous    | Turicibacterales   | -0.486 | 6.12E-04 | 0.025 |

|                 |                     |        |          |          |
|-----------------|---------------------|--------|----------|----------|
| mWAT            | Clostridiales       | -0.482 | 6.90E-04 | 0.026    |
| iWAT            | Clostridiales       | -0.481 | 7.10E-04 | 0.026    |
| Gain weight (g) | Verrucomicrobiales  | 0.477  | 8.11E-04 | 0.026    |
| eWAT            | Bifidobacteriales   | -0.475 | 8.44E-04 | 0.027    |
| Fat mass        | Bifidobacteriales   | -0.471 | 9.55E-04 | 0.027    |
| Visceral fat    | Bacteroidales       | 0.469  | 1.00E-03 | 0.027    |
| Gain weight (g) | Anaeroplasmatales   | -0.466 | 1.10E-03 | 0.028    |
| Fat mass        | Bacteroidales       | 0.465  | 1.12E-03 | 0.028    |
| Visceral fat    | Bifidobacteriales   | -0.455 | 1.51E-03 | 0.029    |
| RWAT            | Bacteroidales       | 0.450  | 1.72E-03 | 0.029    |
| Adiposity Index | Bacteroidales       | 0.448  | 1.81E-03 | 0.029    |
| Adiposity Index | Bifidobacteriales   | -0.445 | 1.92E-03 | 0.030    |
| Subcutaneous    | Verrucomicrobiales  | 0.445  | 1.95E-03 | 0.030    |
| Fat mass        | Actinomycetales     | -0.424 | 3.31E-03 | 0.030    |
| Subcutaneous    | Bacteroidales       | 0.406  | 5.15E-03 | 0.031    |
| Visceral fat    | Actinomycetales     | -0.399 | 6.04E-03 | 0.031    |
| RWAT            | Actinomycetales     | -0.397 | 6.37E-03 | 0.031    |
| Adiposity Index | Actinomycetales     | -0.393 | 6.84E-03 | 0.032    |
| iWAT            | Bifidobacteriales   | -0.389 | 7.58E-03 | 0.032    |
| mWAT            | Bacteroidales       | 0.388  | 7.63E-03 | 0.033    |
| Gain weight (g) | Bifidobacteriales   | -0.388 | 7.63E-03 | 0.033    |
| RWAT            | Bifidobacteriales   | -0.375 | 1.03E-02 | 0.033    |
| iWAT            | Bacteroidales       | 0.364  | 1.28E-02 | 0.034    |
| mWAT            | Bifidobacteriales   | -0.363 | 1.33E-02 | 0.034    |
| Subcutaneous    | Actinomycetales     | -0.356 | 1.51E-02 | 0.034    |
| Subcutaneous    | Anaeroplasmatales   | -0.355 | 1.54E-02 | 0.035    |
| Subcutaneous    | Bifidobacteriales   | -0.355 | 1.55E-02 | 0.035    |
| eWAT            | Actinomycetales     | -0.347 | 1.81E-02 | 0.036    |
| mWAT            | Actinomycetales     | -0.345 | 1.89E-02 | 0.036    |
| iWAT            | Actinomycetales     | -0.335 | 2.28E-02 | 0.036    |
| Subcutaneous    | Pasteurellales      | 0.321  | 2.95E-02 | 0.037    |
| Visceral fat    | Rhizobiales         | -0.315 | 3.30E-02 | 0.037    |
| <i>FAMILY</i>   |                     |        |          |          |
| Fat mass        | Clostridiaceae      | -0.807 | 1.28E-11 | 3.27E-04 |
| Adiposity Index | Clostridiaceae      | -0.791 | 5.93E-11 | 0.001    |
| Visceral fat    | Clostridiaceae      | -0.786 | 9.38E-11 | 0.001    |
| eWAT            | Clostridiaceae      | -0.786 | 9.82E-11 | 0.001    |
| RWAT            | Clostridiaceae      | -0.755 | 1.38E-09 | 0.002    |
| eWAT            | Erysipelotrichaceae | 0.737  | 5.30E-09 | 0.002    |
| Fat mass        | Ruminococcaceae     | -0.735 | 6.05E-09 | 0.002    |
| Gain weight (g) | Erysipelotrichaceae | 0.734  | 6.50E-09 | 0.003    |
| Visceral fat    | Ruminococcaceae     | -0.726 | 1.16E-08 | 0.003    |
| Adiposity Index | Ruminococcaceae     | -0.725 | 1.18E-08 | 0.003    |
| Gain weight (g) | Lachnospiraceae     | 0.723  | 1.41E-08 | 0.004    |
| Gain weight (g) | Clostridiaceae      | -0.722 | 1.45E-08 | 0.004    |
| mWAT            | Clostridiaceae      | -0.721 | 1.62E-08 | 0.004    |
| Visceral fat    | Erysipelotrichaceae | 0.716  | 2.16E-08 | 0.005    |
| Fat mass        | Erysipelotrichaceae | 0.712  | 2.82E-08 | 0.005    |
| Gain weight (g) | Ruminococcaceae     | -0.711 | 3.01E-08 | 0.005    |
| iWAT            | Ruminococcaceae     | -0.711 | 3.08E-08 | 0.006    |
| iWAT            | Lachnospiraceae     | 0.711  | 3.13E-08 | 0.006    |
| Visceral fat    | Lachnospiraceae     | 0.709  | 3.60E-08 | 0.006    |
| mWAT            | Lachnospiraceae     | 0.709  | 3.61E-08 | 0.007    |
| Fat mass        | Lachnospiraceae     | 0.707  | 3.93E-08 | 0.007    |

|                 |                     |        |          |       |
|-----------------|---------------------|--------|----------|-------|
| RWAT            | Ruminococcaceae     | -0.706 | 4.11E-08 | 0.007 |
| RWAT            | Erysipelotrichaceae | 0.704  | 4.67E-08 | 0.008 |
| Visceral fat    | Porphyromonadaceae  | 0.703  | 5.24E-08 | 0.008 |
| RWAT            | Lachnospiraceae     | 0.702  | 5.33E-08 | 0.008 |
| eWAT            | Ruminococcaceae     | -0.697 | 7.32E-08 | 0.008 |
| Adiposity Index | Erysipelotrichaceae | 0.697  | 7.32E-08 | 0.009 |
| iWAT            | Clostridiaceae      | -0.696 | 8.03E-08 | 0.009 |
| iWAT            | Erysipelotrichaceae | 0.692  | 9.89E-08 | 0.009 |
| Adiposity Index | Porphyromonadaceae  | 0.692  | 1.02E-07 | 0.010 |
| Adiposity Index | Lachnospiraceae     | 0.691  | 1.07E-07 | 0.010 |
| Fat mass        | Porphyromonadaceae  | 0.690  | 1.16E-07 | 0.010 |
| eWAT            | Porphyromonadaceae  | 0.681  | 1.89E-07 | 0.011 |
| eWAT            | Lachnospiraceae     | 0.679  | 2.10E-07 | 0.011 |
| RWAT            | Bacteroidaceae      | 0.678  | 2.25E-07 | 0.011 |
| Fat mass        | Mogibacteriaceae    | -0.674 | 2.83E-07 | 0.012 |
| Gain weight (g) | Porphyromonadaceae  | 0.670  | 3.46E-07 | 0.012 |
| mWAT            | Erysipelotrichaceae | 0.669  | 3.70E-07 | 0.012 |
| RWAT            | Porphyromonadaceae  | 0.667  | 4.17E-07 | 0.013 |
| iWAT            | Streptococcaceae    | -0.666 | 4.46E-07 | 0.013 |
| mWAT            | Ruminococcaceae     | -0.660 | 6.02E-07 | 0.013 |
| Gain weight (g) | Bacteroidaceae      | 0.660  | 6.15E-07 | 0.014 |
| eWAT            | Bacteroidaceae      | 0.658  | 6.64E-07 | 0.014 |
| eWAT            | Moraxellaceae       | 0.657  | 7.26E-07 | 0.014 |
| Fat mass        | Bacteroidaceae      | 0.656  | 7.46E-07 | 0.015 |
| Subcutaneous    | Clostridiaceae      | -0.647 | 1.20E-06 | 0.015 |
| Adiposity Index | Bacteroidaceae      | 0.647  | 1.21E-06 | 0.015 |
| mWAT            | Bacteroidaceae      | 0.646  | 1.22E-06 | 0.016 |
| Adiposity Index | Mogibacteriaceae    | -0.641 | 1.60E-06 | 0.016 |
| Gain weight (g) | Mogibacteriaceae    | -0.641 | 1.62E-06 | 0.016 |
| Visceral fat    | Mogibacteriaceae    | -0.640 | 1.64E-06 | 0.017 |
| Visceral fat    | Bacteroidaceae      | 0.640  | 1.67E-06 | 0.017 |
| iWAT            | Porphyromonadaceae  | 0.635  | 2.09E-06 | 0.017 |
| Subcutaneous    | Ruminococcaceae     | -0.634 | 2.24E-06 | 0.018 |
| eWAT            | Verrucomicrobiaceae | 0.629  | 2.85E-06 | 0.018 |
| mWAT            | Porphyromonadaceae  | 0.629  | 2.91E-06 | 0.018 |
| eWAT            | Mogibacteriaceae    | -0.628 | 3.00E-06 | 0.019 |
| Visceral fat    | Moraxellaceae       | 0.627  | 3.10E-06 | 0.019 |
| RWAT            | Mogibacteriaceae    | -0.622 | 3.95E-06 | 0.019 |
| iWAT            | Mogibacteriaceae    | -0.619 | 4.46E-06 | 0.020 |
| Gain weight (g) | Streptococcaceae    | -0.616 | 5.07E-06 | 0.020 |
| RWAT            | Streptococcaceae    | -0.614 | 5.63E-06 | 0.020 |
| iWAT            | Verrucomicrobiaceae | 0.607  | 7.60E-06 | 0.021 |
| Fat mass        | Moraxellaceae       | 0.605  | 8.30E-06 | 0.021 |
| Fat mass        | Streptococcaceae    | -0.604 | 8.88E-06 | 0.021 |
| Subcutaneous    | Erysipelotrichaceae | 0.590  | 1.60E-05 | 0.022 |

|                 |                    |        |          |       |
|-----------------|--------------------|--------|----------|-------|
| Visceral fat    | Verrucomicrobiacea |        |          |       |
|                 | e                  | 0.586  | 1.90E-05 | 0.022 |
| Fat mass        | Verrucomicrobiacea |        |          |       |
|                 | e                  | 0.585  | 1.94E-05 | 0.022 |
| Adiposity Index | Moraxellaceae      | 0.585  | 1.95E-05 | 0.023 |
| RWAT            | Anaeroplasmatacea  |        |          |       |
|                 | e                  | -0.579 | 2.50E-05 | 0.023 |
| Subcutaneous    | Mogibacteriaceae   | -0.579 | 2.53E-05 | 0.023 |
| Subcutaneous    | Porphyromonadaceae |        |          |       |
|                 | ae                 | 0.578  | 2.55E-05 | 0.024 |
| mWAT            | Mogibacteriaceae   | -0.574 | 3.02E-05 | 0.024 |
| Visceral fat    | Streptococcaceae   | -0.574 | 3.03E-05 | 0.024 |
| Adiposity Index | Streptococcaceae   | -0.570 | 3.58E-05 | 0.025 |
| Visceral fat    | Rikenellaceae      | -0.569 | 3.70E-05 | 0.025 |
| Adiposity Index | Verrucomicrobiacea |        |          |       |
|                 | e                  | 0.567  | 4.03E-05 | 0.025 |
| eWAT            | Streptococcaceae   | -0.564 | 4.51E-05 | 0.025 |
| RWAT            | Verrucomicrobiacea |        |          |       |
|                 | e                  | 0.562  | 4.82E-05 | 0.026 |
| mWAT            | Verrucomicrobiacea |        |          |       |
|                 | e                  | 0.559  | 5.49E-05 | 0.026 |
| RWAT            | Moraxellaceae      | 0.558  | 5.52E-05 | 0.026 |
| eWAT            | Rikenellaceae      | -0.555 | 6.18E-05 | 0.027 |
| mWAT            | Moraxellaceae      | 0.552  | 7.10E-05 | 0.027 |
| iWAT            | Bacteroidaceae     | 0.549  | 7.91E-05 | 0.027 |
| Subcutaneous    | Lachnospiraceae    | 0.548  | 8.02E-05 | 0.028 |
| Subcutaneous    | Bacteroidaceae     | 0.546  | 8.68E-05 | 0.028 |
| mWAT            | Streptococcaceae   | -0.546 | 8.81E-05 | 0.028 |
| Gain weight (g) | Moraxellaceae      | 0.542  | 1.01E-04 | 0.029 |
| mWAT            | Anaeroplasmatacea  |        |          |       |
|                 | e                  | -0.530 | 1.53E-04 | 0.029 |
| iWAT            | Anaeroplasmatacea  |        |          |       |
|                 | e                  | -0.529 | 1.57E-04 | 0.029 |
| Fat mass        | Rikenellaceae      | -0.527 | 1.66E-04 | 0.030 |
| iWAT            | Moraxellaceae      | 0.523  | 1.90E-04 | 0.030 |
| Gain weight (g) | Rikenellaceae      | -0.521 | 2.02E-04 | 0.030 |
| Fat mass        | Anaeroplasmatacea  |        |          |       |
|                 | e                  | -0.519 | 2.22E-04 | 0.031 |
| RWAT            | Rikenellaceae      | -0.514 | 2.60E-04 | 0.031 |
| Visceral fat    | Anaeroplasmatacea  |        |          |       |
|                 | e                  | -0.513 | 2.64E-04 | 0.031 |
| Adiposity Index | Anaeroplasmatacea  |        |          |       |
|                 | e                  | -0.510 | 2.97E-04 | 0.032 |
| Adiposity Index | Rikenellaceae      | -0.501 | 3.93E-04 | 0.032 |
| eWAT            | Anaeroplasmatacea  |        |          |       |
|                 | e                  | -0.499 | 4.17E-04 | 0.032 |
| Subcutaneous    | Moraxellaceae      | 0.493  | 5.07E-04 | 0.033 |
| mWAT            | Rikenellaceae      | -0.491 | 5.34E-04 | 0.033 |
| Gain weight (g) | Verrucomicrobiacea |        |          |       |
|                 | e                  | 0.477  | 8.11E-04 | 0.033 |
| eWAT            | Bifidobacteriaceae | -0.475 | 8.44E-04 | 0.034 |
| Subcutaneous    | Streptococcaceae   | -0.473 | 8.99E-04 | 0.034 |
| Fat mass        | Bifidobacteriaceae | -0.471 | 9.55E-04 | 0.034 |
| Gain weight (g) | Anaeroplasmatacea  |        |          |       |
|                 | e                  | -0.466 | 1.10E-03 | 0.035 |

|                 |                     |        |          |          |
|-----------------|---------------------|--------|----------|----------|
| iWAT            | Rikenellaceae       | -0.459 | 1.35E-03 | 0.035    |
| Visceral fat    | Bifidobacteriaceae  | -0.455 | 1.51E-03 | 0.035    |
| Adiposity Index | Bifidobacteriaceae  | -0.445 | 1.92E-03 | 0.036    |
| Subcutaneous    | Verrucomicrobiacea  |        |          |          |
|                 | e                   | 0.445  | 1.95E-03 | 0.036    |
| Subcutaneous    | Rikenellaceae       | -0.420 | 3.65E-03 | 0.036    |
| iWAT            | Bifidobacteriaceae  | -0.389 | 7.58E-03 | 0.037    |
| Gain weight (g) | Bifidobacteriaceae  | -0.388 | 7.63E-03 | 0.037    |
| RWAT            | Bifidobacteriaceae  | -0.375 | 1.03E-02 | 0.037    |
| iWAT            | Christensenellaceae | -0.374 | 1.03E-02 | 0.038    |
| mWAT            | Bifidobacteriaceae  | -0.363 | 1.33E-02 | 0.038    |
| Subcutaneous    | Anaeroplasmatacea   |        |          |          |
|                 | e                   | -0.355 | 1.54E-02 | 0.038    |
| Subcutaneous    | Bifidobacteriaceae  | -0.355 | 1.55E-02 | 0.039    |
| Adiposity Index | Christensenellaceae | -0.338 | 2.18E-02 | 0.039    |
| Adiposity Index | Prevotellaceae      | -0.336 | 2.25E-02 | 0.039    |
| RWAT            | Dehalobacteriaceae  | 0.335  | 2.29E-02 | 0.040    |
| Subcutaneous    | Pasteurellaceae     | 0.321  | 2.95E-02 | 0.040    |
| Fat mass        | Dehalobacteriaceae  | 0.319  | 3.07E-02 | 0.040    |
| mWAT            | Prevotellaceae      | -0.317 | 3.21E-02 | 0.041    |
| iWAT            | Dehalobacteriaceae  | 0.316  | 3.24E-02 | 0.041    |
| Subcutaneous    | Prevotellaceae      | -0.316 | 3.27E-02 | 0.041    |
| Fat mass        | Christensenellaceae | -0.313 | 3.39E-02 | 0.042    |
| Fat mass        | Prevotellaceae      | -0.306 | 3.88E-02 | 0.042    |
| Adiposity Index | Pasteurellaceae     | 0.302  | 4.10E-02 | 0.042    |
| <b>GENUS</b>    |                     |        |          |          |
| eWAT            | SMB53               | -0.755 | 1.30E-09 | 1.54E-04 |
| Gain weight (g) | Oscillospira        | -0.732 | 7.57E-09 | 3.09E-04 |
| Fat mass        | SMB53               | -0.729 | 9.16E-09 | 4.63E-04 |
| Visceral fat    | SMB53               | -0.725 | 1.25E-08 | 0.001    |
| eWAT            | Oscillospira        | -0.717 | 2.12E-08 | 0.001    |
| Fat mass        | Oscillospira        | -0.717 | 2.14E-08 | 0.001    |
| Visceral fat    | Oscillospira        | -0.714 | 2.46E-08 | 0.001    |
| eWAT            | Clostridium         | -0.711 | 3.05E-08 | 0.001    |
| Adiposity Index | SMB53               | -0.707 | 3.96E-08 | 0.001    |
| iWAT            | Lactococcus         | -0.706 | 4.11E-08 | 0.002    |
| Adiposity Index | Clostridium         | -0.705 | 4.56E-08 | 0.002    |
| Adiposity Index | Oscillospira        | -0.703 | 5.04E-08 | 0.002    |
| Visceral fat    | Clostridium         | -0.701 | 5.66E-08 | 0.002    |
| RWAT            | SMB53               | -0.701 | 5.80E-08 | 0.002    |
| Fat mass        | Clostridium         | -0.701 | 5.83E-08 | 0.002    |
| RWAT            | Oscillospira        | -0.698 | 6.85E-08 | 0.002    |
| Gain weight (g) | Lactococcus         | -0.688 | 1.24E-07 | 0.003    |
| Fat mass        | Anaerostipes        | -0.683 | 1.72E-07 | 0.003    |
| Fat mass        | Lactococcus         | -0.680 | 2.03E-07 | 0.003    |
| Adiposity Index | Anaerostipes        | -0.674 | 2.84E-07 | 0.003    |
| Gain weight (g) | SMB53               | -0.671 | 3.27E-07 | 0.003    |
| RWAT            | Lactococcus         | -0.655 | 7.74E-07 | 0.003    |
| Subcutaneous    | Oscillospira        | -0.654 | 8.26E-07 | 0.004    |
| Visceral fat    | Anaerostipes        | -0.647 | 1.17E-06 | 0.004    |
| eWAT            | Anaerostipes        | -0.644 | 1.35E-06 | 0.004    |
| mWAT            | SMB53               | -0.642 | 1.53E-06 | 0.004    |
| Adiposity Index | Lactococcus         | -0.639 | 1.78E-06 | 0.004    |
| eWAT            | Ruminococcus        | -0.638 | 1.88E-06 | 0.004    |

|                 |              |        |          |       |
|-----------------|--------------|--------|----------|-------|
| Adiposity Index | Ruminococcus | -0.637 | 1.89E-06 | 0.004 |
| eWAT            | Moryella     | -0.634 | 2.25E-06 | 0.005 |
| Fat mass        | Ruminococcus | -0.629 | 2.88E-06 | 0.005 |
| eWAT            | Lactococcus  | -0.628 | 2.97E-06 | 0.005 |
| RWAT            | Moryella     | -0.627 | 3.11E-06 | 0.005 |
| Visceral fat    | Lactococcus  | -0.626 | 3.27E-06 | 0.005 |
| mWAT            | Oscillospira | -0.625 | 3.38E-06 | 0.005 |
| Gain weight (g) | Bilophila    | -0.623 | 3.70E-06 | 0.006 |
| Visceral fat    | Ruminococcus | -0.620 | 4.28E-06 | 0.006 |
| Visceral fat    | Bilophila    | -0.620 | 4.33E-06 | 0.006 |
| RWAT            | Anaerostipes | -0.618 | 4.76E-06 | 0.006 |
| RWAT            | Clostridium  | -0.615 | 5.37E-06 | 0.006 |
| Fat mass        | Moryella     | -0.614 | 5.72E-06 | 0.006 |
| iWAT            | Anaerostipes | -0.613 | 5.81E-06 | 0.006 |
| Fat mass        | Bilophila    | -0.613 | 5.85E-06 | 0.007 |
| Subcutaneous    | SMB53        | -0.612 | 6.15E-06 | 0.007 |
| mWAT            | Lactococcus  | -0.610 | 6.89E-06 | 0.007 |
| iWAT            | SMB53        | -0.605 | 8.47E-06 | 0.007 |
| iWAT            | Ruminococcus | -0.603 | 9.17E-06 | 0.007 |
| eWAT            | Bilophila    | -0.602 | 9.57E-06 | 0.007 |
| iWAT            | Oscillospira | -0.601 | 1.02E-05 | 0.008 |
| Gain weight (g) | Clostridium  | -0.598 | 1.16E-05 | 0.008 |
| Adiposity Index | Bilophila    | -0.596 | 1.25E-05 | 0.008 |
| Adiposity Index | Moryella     | -0.593 | 1.39E-05 | 0.008 |
| Gain weight (g) | Ruminococcus | -0.592 | 1.49E-05 | 0.008 |
| mWAT            | Clostridium  | -0.591 | 1.55E-05 | 0.008 |
| Visceral fat    | Moryella     | -0.591 | 1.56E-05 | 0.008 |
| Subcutaneous    | Anaerostipes | -0.588 | 1.72E-05 | 0.009 |
| RWAT            | Anaeroplasma | -0.579 | 2.50E-05 | 0.009 |
| Gain weight (g) | Moryella     | -0.576 | 2.83E-05 | 0.009 |
| iWAT            | Moryella     | -0.576 | 2.84E-05 | 0.009 |
| mWAT            | Bilophila    | -0.562 | 4.91E-05 | 0.009 |
| RWAT            | Bilophila    | -0.560 | 5.27E-05 | 0.009 |
| Subcutaneous    | Lactococcus  | -0.551 | 7.23E-05 | 0.010 |
| mWAT            | Anaerostipes | -0.548 | 8.10E-05 | 0.010 |
| mWAT            | Moryella     | -0.548 | 8.16E-05 | 0.010 |
| Subcutaneous    | Clostridium  | -0.538 | 1.15E-04 | 0.010 |
| Gain weight (g) | Anaerostipes | -0.537 | 1.19E-04 | 0.010 |
| RWAT            | Ruminococcus | -0.535 | 1.26E-04 | 0.010 |
| Subcutaneous    | Bilophila    | -0.534 | 1.30E-04 | 0.010 |
| mWAT            | Anaeroplasma | -0.530 | 1.53E-04 | 0.011 |
| iWAT            | Anaeroplasma | -0.529 | 1.57E-04 | 0.011 |
| Subcutaneous    | Moryella     | -0.527 | 1.65E-04 | 0.011 |
| Subcutaneous    | Ruminococcus | -0.522 | 1.96E-04 | 0.011 |
| iWAT            | Bilophila    | -0.519 | 2.19E-04 | 0.011 |
| Fat mass        | Anaeroplasma | -0.519 | 2.22E-04 | 0.011 |
| Visceral fat    | Anaeroplasma | -0.513 | 2.64E-04 | 0.012 |
| Adiposity Index | Anaeroplasma | -0.510 | 2.97E-04 | 0.012 |
| Fat mass        | Rothia       | -0.507 | 3.27E-04 | 0.012 |
| iWAT            | Clostridium  | -0.505 | 3.45E-04 | 0.012 |
| Visceral fat    | Rothia       | -0.504 | 3.60E-04 | 0.012 |
| mWAT            | Ruminococcus | -0.500 | 3.99E-04 | 0.012 |
| mWAT            | Roseburia    | 0.502  | 3.79E-04 | 0.013 |
| iWAT            | Butyrivibrio | 0.502  | 3.73E-04 | 0.013 |
| RWAT            | Xenorhabdus  | 0.504  | 3.60E-04 | 0.013 |

|                 |                 |       |          |       |
|-----------------|-----------------|-------|----------|-------|
| mWAT            | Escherichia     | 0.510 | 2.99E-04 | 0.013 |
| Gain weight (g) | Escherichia     | 0.510 | 2.95E-04 | 0.013 |
| eWAT            | Klebsiella      | 0.511 | 2.87E-04 | 0.013 |
| mWAT            | Xenorhabdus     | 0.517 | 2.31E-04 | 0.013 |
| Visceral fat    | Anaerofustis    | 0.518 | 2.30E-04 | 0.014 |
| Fat mass        | Anaerofustis    | 0.519 | 2.16E-04 | 0.014 |
| Visceral fat    | Klebsiella      | 0.521 | 2.07E-04 | 0.014 |
| Adiposity Index | Enterobacter    | 0.521 | 2.06E-04 | 0.014 |
| Fat mass        | Enterobacter    | 0.522 | 2.00E-04 | 0.014 |
| eWAT            | Enterobacter    | 0.531 | 1.48E-04 | 0.014 |
| mWAT            | Butyrivibrio    | 0.534 | 1.30E-04 | 0.015 |
| mWAT            | Coprococcus     | 0.536 | 1.22E-04 | 0.015 |
| RWAT            | Anaerotruncus   | 0.541 | 1.05E-04 | 0.015 |
| eWAT            | Anaerotruncus   | 0.543 | 9.65E-05 | 0.015 |
| Visceral fat    | Anaerotruncus   | 0.544 | 9.24E-05 | 0.015 |
| iWAT            | Coprococcus     | 0.545 | 9.09E-05 | 0.015 |
| Subcutaneous    | Bacteroides     | 0.546 | 8.68E-05 | 0.015 |
| Adiposity Index | Anaerofustis    | 0.548 | 8.12E-05 | 0.016 |
| iWAT            | Bacteroides     | 0.549 | 7.91E-05 | 0.016 |
| iWAT            | Escherichia     | 0.554 | 6.59E-05 | 0.016 |
| Visceral fat    | Enterobacter    | 0.554 | 6.53E-05 | 0.016 |
| Subcutaneous    | Butyrivibrio    | 0.558 | 5.66E-05 | 0.016 |
| Fat mass        | Anaerotruncus   | 0.558 | 5.61E-05 | 0.016 |
| Adiposity Index | Anaerotruncus   | 0.558 | 5.53E-05 | 0.017 |
| mWAT            | Akkermansia     | 0.559 | 5.49E-05 | 0.017 |
| RWAT            | Anaerofustis    | 0.560 | 5.16E-05 | 0.017 |
| RWAT            | Akkermansia     | 0.562 | 4.82E-05 | 0.017 |
| Gain weight (g) | Dorea           | 0.563 | 4.71E-05 | 0.017 |
| Adiposity Index | Butyrivibrio    | 0.566 | 4.14E-05 | 0.017 |
| Adiposity Index | Akkermansia     | 0.567 | 4.03E-05 | 0.017 |
| Visceral fat    | Coprococcus     | 0.568 | 3.83E-05 | 0.018 |
| RWAT            | Butyrivibrio    | 0.568 | 3.81E-05 | 0.018 |
| Visceral fat    | Butyrivibrio    | 0.573 | 3.14E-05 | 0.018 |
| Adiposity Index | Escherichia     | 0.577 | 2.68E-05 | 0.018 |
| Fat mass        | Escherichia     | 0.578 | 2.61E-05 | 0.018 |
| Subcutaneous    | Parabacteroides | 0.578 | 2.55E-05 | 0.018 |
| eWAT            | Butyrivibrio    | 0.580 | 2.36E-05 | 0.019 |
| Fat mass        | Butyrivibrio    | 0.582 | 2.25E-05 | 0.019 |
| eWAT            | Coprococcus     | 0.585 | 1.97E-05 | 0.019 |
| Fat mass        | Akkermansia     | 0.585 | 1.94E-05 | 0.019 |
| Visceral fat    | Akkermansia     | 0.586 | 1.90E-05 | 0.019 |
| RWAT            | Coprococcus     | 0.586 | 1.85E-05 | 0.019 |
| Subcutaneous    | Coprococcus     | 0.590 | 1.62E-05 | 0.019 |
| Fat mass        | Xenorhabdus     | 0.590 | 1.62E-05 | 0.020 |
| Gain weight (g) | Coprococcus     | 0.595 | 1.28E-05 | 0.020 |
| Gain weight (g) | Butyrivibrio    | 0.602 | 9.79E-06 | 0.020 |
| Adiposity Index | Xenorhabdus     | 0.604 | 8.74E-06 | 0.020 |
| eWAT            | Escherichia     | 0.605 | 8.27E-06 | 0.020 |
| iWAT            | Akkermansia     | 0.607 | 7.60E-06 | 0.020 |
| Visceral fat    | Escherichia     | 0.611 | 6.39E-06 | 0.021 |
| Adiposity Index | Coprococcus     | 0.615 | 5.44E-06 | 0.021 |
| Fat mass        | Coprococcus     | 0.619 | 4.50E-06 | 0.021 |
| mWAT            | Parabacteroides | 0.629 | 2.91E-06 | 0.021 |
| eWAT            | Akkermansia     | 0.629 | 2.85E-06 | 0.021 |
| iWAT            | Parabacteroides | 0.635 | 2.09E-06 | 0.021 |



|                 |                 |        |          |       |
|-----------------|-----------------|--------|----------|-------|
| Visceral fat    | Bacteroides     | 0.640  | 1.67E-06 | 0.021 |
| Visceral fat    | Xenorhabdus     | 0.646  | 1.27E-06 | 0.022 |
| mWAT            | Bacteroides     | 0.646  | 1.22E-06 | 0.022 |
| Adiposity Index | Bacteroides     | 0.647  | 1.21E-06 | 0.022 |
| Fat mass        | Bacteroides     | 0.656  | 7.46E-07 | 0.022 |
| eWAT            | Bacteroides     | 0.658  | 6.64E-07 | 0.022 |
| eWAT            | Xenorhabdus     | 0.659  | 6.40E-07 | 0.022 |
| Gain weight (g) | Bacteroides     | 0.660  | 6.15E-07 | 0.023 |
| iWAT            | Blautia         | 0.661  | 5.71E-07 | 0.023 |
| RWAT            | Parabacteroides | 0.667  | 4.17E-07 | 0.023 |
| Gain weight (g) | Parabacteroides | 0.670  | 3.46E-07 | 0.023 |
| RWAT            | Bacteroides     | 0.678  | 2.25E-07 | 0.023 |
| Subcutaneous    | Blautia         | 0.678  | 2.20E-07 | 0.023 |
| eWAT            | Parabacteroides | 0.681  | 1.89E-07 | 0.023 |
| Fat mass        | Parabacteroides | 0.690  | 1.16E-07 | 0.024 |
| Adiposity Index | Parabacteroides | 0.692  | 1.02E-07 | 0.024 |
| Subcutaneous    | Sutterella      | 0.695  | 8.13E-08 | 0.024 |
| Visceral fat    | Parabacteroides | 0.703  | 5.24E-08 | 0.024 |
| mWAT            | Blautia         | 0.710  | 3.22E-08 | 0.024 |
| mWAT            | Sutterella      | 0.724  | 1.26E-08 | 0.024 |
| Gain weight (g) | Blautia         | 0.735  | 6.13E-09 | 0.025 |
| eWAT            | Blautia         | 0.736  | 5.44E-09 | 0.025 |
| Adiposity Index | Blautia         | 0.740  | 4.35E-09 | 0.025 |
| eWAT            | Sutterella      | 0.741  | 3.94E-09 | 0.025 |
| Visceral fat    | Blautia         | 0.742  | 3.73E-09 | 0.025 |
| iWAT            | Sutterella      | 0.742  | 3.49E-09 | 0.025 |
| Visceral fat    | Sutterella      | 0.752  | 1.74E-09 | 0.025 |
| Fat mass        | Blautia         | 0.754  | 1.42E-09 | 0.026 |
| RWAT            | Sutterella      | 0.760  | 9.30E-10 | 0.026 |
| Gain weight (g) | Sutterella      | 0.760  | 9.20E-10 | 0.026 |
| RWAT            | Blautia         | 0.767  | 5.13E-10 | 0.026 |
| Adiposity Index | Sutterella      | 0.768  | 4.55E-10 | 0.026 |
| Fat mass        | Sutterella      | 0.773  | 3.19E-10 | 0.026 |
| eWAT            | Anaeroplasm     | -0.499 | 4.17E-04 | 0.027 |
| Adiposity Index | Rothia          | -0.496 | 4.59E-04 | 0.027 |
| eWAT            | Bifidobacterium | -0.475 | 8.44E-04 | 0.027 |
| Fat mass        | Bifidobacterium | -0.471 | 9.55E-04 | 0.027 |
| Gain weight (g) | Anaeroplasm     | -0.466 | 1.10E-03 | 0.027 |
| Visceral fat    | Bifidobacterium | -0.455 | 1.51E-03 | 0.027 |
| Subcutaneous    | Rothia          | -0.452 | 1.61E-03 | 0.027 |
| Adiposity Index | Bifidobacterium | -0.445 | 1.92E-03 | 0.028 |
| eWAT            | Rothia          | -0.433 | 2.62E-03 | 0.028 |
| RWAT            | Rothia          | -0.419 | 3.75E-03 | 0.028 |
| mWAT            | Rothia          | -0.414 | 4.27E-03 | 0.028 |
| Gain weight (g) | Rothia          | -0.397 | 6.35E-03 | 0.028 |
| iWAT            | Bifidobacterium | -0.389 | 7.58E-03 | 0.028 |
| Gain weight (g) | Bifidobacterium | -0.388 | 7.63E-03 | 0.029 |
| RWAT            | Bifidobacterium | -0.375 | 1.03E-02 | 0.029 |
| mWAT            | Bifidobacterium | -0.363 | 1.33E-02 | 0.029 |
| Subcutaneous    | Anaeroplasm     | -0.355 | 1.54E-02 | 0.029 |
| Subcutaneous    | Bifidobacterium | -0.355 | 1.55E-02 | 0.029 |
| iWAT            | Rothia          | -0.335 | 2.27E-02 | 0.029 |
| Visceral fat    | Dehalobacterium | 0.297  | 4.50E-02 | 0.029 |
| mWAT            | Dehalobacterium | 0.302  | 4.15E-02 | 0.030 |
| Subcutaneous    | Streptococcus   | 0.308  | 3.72E-02 | 0.030 |

|                 |                 |       |          |       |
|-----------------|-----------------|-------|----------|-------|
| Subcutaneous    | Aggregatibacter | 0.311 | 3.55E-02 | 0.030 |
| eWAT            | Allobaculum     | 0.313 | 3.44E-02 | 0.030 |
| eWAT            | Streptococcus   | 0.314 | 3.37E-02 | 0.030 |
| eWAT            | Dehalobacterium | 0.315 | 3.30E-02 | 0.030 |
| Subcutaneous    | Dehalobacterium | 0.316 | 3.22E-02 | 0.031 |
| Adiposity Index | Dehalobacterium | 0.322 | 2.89E-02 | 0.031 |
| iWAT            | Roseburia       | 0.332 | 2.41E-02 | 0.031 |
| Visceral fat    | Shuttleworthia  | 0.335 | 2.28E-02 | 0.031 |
| Subcutaneous    | Shuttleworthia  | 0.337 | 2.19E-02 | 0.031 |
| mWAT            | Allobaculum     | 0.341 | 2.05E-02 | 0.031 |
| iWAT            | Allobaculum     | 0.343 | 1.97E-02 | 0.031 |
| eWAT            | Roseburia       | 0.351 | 1.69E-02 | 0.032 |
| Subcutaneous    | Klebsiella      | 0.355 | 1.55E-02 | 0.032 |
| Fat mass        | Shuttleworthia  | 0.355 | 1.53E-02 | 0.032 |
| iWAT            | Dehalobacterium | 0.357 | 1.49E-02 | 0.032 |
| Fat mass        | Dehalobacterium | 0.359 | 1.43E-02 | 0.032 |
| Gain weight (g) | Allobaculum     | 0.365 | 1.26E-02 | 0.032 |
| iWAT            | Klebsiella      | 0.367 | 1.22E-02 | 0.033 |
| RWAT            | Dehalobacterium | 0.370 | 1.13E-02 | 0.033 |
| Adiposity Index | Shuttleworthia  | 0.372 | 1.08E-02 | 0.033 |
| Gain weight (g) | Anaerofustis    | 0.378 | 9.70E-03 | 0.033 |
| Gain weight (g) | Klebsiella      | 0.382 | 8.76E-03 | 0.033 |
| Subcutaneous    | Escherichia     | 0.392 | 7.11E-03 | 0.033 |
| Subcutaneous    | Roseburia       | 0.392 | 6.99E-03 | 0.033 |
| Visceral fat    | Roseburia       | 0.397 | 6.23E-03 | 0.034 |
| iWAT            | Enterobacter    | 0.399 | 6.04E-03 | 0.034 |
| Adiposity Index | Roseburia       | 0.405 | 5.30E-03 | 0.034 |
| eWAT            | Dorea           | 0.411 | 4.58E-03 | 0.034 |
| Subcutaneous    | Enterobacter    | 0.414 | 4.25E-03 | 0.034 |
| RWAT            | Klebsiella      | 0.416 | 4.05E-03 | 0.034 |
| Fat mass        | Roseburia       | 0.417 | 3.94E-03 | 0.035 |
| iWAT            | Xenorhabdus     | 0.421 | 3.56E-03 | 0.035 |
| mWAT            | Klebsiella      | 0.435 | 2.51E-03 | 0.035 |
| mWAT            | Anaerofustis    | 0.435 | 2.49E-03 | 0.035 |
| Gain weight (g) | Anaerotruncus   | 0.444 | 1.97E-03 | 0.035 |
| Subcutaneous    | Dorea           | 0.445 | 1.96E-03 | 0.035 |
| Subcutaneous    | Akkermansia     | 0.445 | 1.95E-03 | 0.035 |
| RWAT            | Enterobacter    | 0.451 | 1.64E-03 | 0.036 |
| RWAT            | Roseburia       | 0.456 | 1.44E-03 | 0.036 |
| RWAT            | Escherichia     | 0.456 | 1.44E-03 | 0.036 |
| Gain weight (g) | Roseburia       | 0.459 | 1.34E-03 | 0.036 |
| Adiposity Index | Dorea           | 0.461 | 1.27E-03 | 0.036 |
| iWAT            | Dorea           | 0.461 | 1.27E-03 | 0.036 |
| Subcutaneous    | Xenorhabdus     | 0.462 | 1.23E-03 | 0.037 |
| Subcutaneous    | Anaerofustis    | 0.462 | 1.23E-03 | 0.037 |
| Gain weight (g) | Enterobacter    | 0.464 | 1.17E-03 | 0.037 |
| Visceral fat    | Dorea           | 0.464 | 1.17E-03 | 0.037 |
| mWAT            | Enterobacter    | 0.470 | 9.69E-04 | 0.037 |
| mWAT            | Anaerotruncus   | 0.472 | 9.21E-04 | 0.037 |
| Fat mass        | Dorea           | 0.474 | 8.71E-04 | 0.038 |
| Gain weight (g) | Akkermansia     | 0.477 | 8.11E-04 | 0.038 |
| iWAT            | Anaerofustis    | 0.477 | 7.97E-04 | 0.038 |
| Fat mass        | Klebsiella      | 0.479 | 7.62E-04 | 0.038 |
| Gain weight (g) | Xenorhabdus     | 0.485 | 6.42E-04 | 0.038 |
| mWAT            | Dorea           | 0.486 | 6.11E-04 | 0.038 |

|                 |               |       |          |       |
|-----------------|---------------|-------|----------|-------|
| iWAT            | Anaerotruncus | 0.486 | 6.09E-04 | 0.038 |
| Adiposity Index | Klebsiella    | 0.493 | 4.98E-04 | 0.039 |
| RWAT            | Dorea         | 0.494 | 4.86E-04 | 0.039 |
| eWAT            | Anaerofustis  | 0.498 | 4.34E-04 | 0.039 |
| Subcutaneous    | Anaerotruncus | 0.499 | 4.13E-04 | 0.039 |

<sup>a</sup>Spearman's rank-order correlation coefficient (rho).

<sup>b</sup>The correlations were significant when the P-value and FDR (False Discovery Ratio) was < 0.05. (n=7-8)
